# Supplementary material for: The Discovery of Oropharyngeal Microbiota with Inhibitory Activity against Pathogenic Neisseria gonorrhoeae and Neisseria meningitidis: An In Vitro Study of Clinical Isolates
Source: MDPI journal article supplement (doi:10.3390/microorganisms10122497), 2022-12-16
Supplement: s1 [file s1]

## Supplementary Materials

**Table S1.** Inhibitory Isolates (62 isolates, 14 species, 2 genera).

| ID     | Sample Type | Pharyngeal Gonorrhoea | No of Isolates | Inhibitory to <i>N. Gonorrhoeae</i> | Inhibitory to <i>N. Meningitidis</i> | MALDI-TOF ID                       |
|--------|-------------|-----------------------|----------------|-------------------------------------|--------------------------------------|------------------------------------|
| 7. M0  | Baseline    | Negative              | 3              | Yes                                 | Yes                                  | <i>Streptococcus pyogenes</i>      |
| 8. M0  | Baseline    | Negative              | 2              | Yes                                 | Yes                                  | <i>Streptococcus cristatus</i>     |
| 8. M0  | Baseline    | Negative              | 3              | Yes                                 | No                                   | <i>Streptococcus oralis</i>        |
| 10. M0 | Baseline    | Negative              | 2              | Yes                                 | No                                   | <i>Streptococcus parasanguinis</i> |
| 12. M0 | Baseline    | Negative              | 1              | Yes                                 | No                                   | <i>Streptococcus salivarius</i>    |
| 13. M0 | Baseline    | Negative              | 1              | Yes                                 | Yes                                  | <i>Streptococcus mitis</i>         |
| 13. M0 | Baseline    | Negative              | 2              | Yes                                 | Yes                                  | <i>Streptococcus parasanguinis</i> |
| 13. M0 | Baseline    | Negative              | 3              | Yes                                 | Yes                                  | <i>Streptococcus salivarius</i>    |
| 13. M0 | Baseline    | Negative              | 4              | Yes                                 | Yes                                  | <i>Streptococcus mitis</i>         |
| 15. M0 | Baseline    | Negative              | 1              | Yes                                 | Yes                                  | <i>Streptococcus dysgalactiae</i>  |
| 15. M0 | Baseline    | Negative              | 2              | Yes                                 | No                                   | <i>Streptococcus dysgalactiae</i>  |
| 15. M0 | Baseline    | Negative              | 3              | Yes                                 | No                                   | <i>Streptococcus parasanguinis</i> |
| 44. M0 | Baseline    | Negative              | 2              | Yes                                 | No                                   | <i>Streptococcus cristatus</i>     |
| 45. M0 | Baseline    | Negative              | 1              | Yes                                 | No                                   | <i>Streptococcus cristatus</i>     |
| 51. M0 | Baseline    | Negative              | 1              | Yes                                 | Yes                                  | <i>Streptococcus sanguinis</i>     |
| 51. M0 | Baseline    | Negative              | 3              | No                                  | Yes                                  | <i>Streptococcus sanguinis</i>     |
| 51. M0 | Baseline    | Negative              | 4              | Yes                                 | Yes                                  | <i>Streptococcus sanguinis</i>     |
| 51. M0 | Baseline    | Negative              | 5              | No                                  | Yes                                  | <i>Streptococcus salivarius</i>    |
| 51. M0 | Baseline    | Negative              | 6              | No                                  | Yes                                  | <i>Streptococcus sanguinis</i>     |
| 51. M0 | Baseline    | Negative              | 7              | No                                  | Yes                                  | <i>Rothia mucilaginosa</i>         |
| 53. M0 | Baseline    | Negative              | 2              | Yes                                 | Yes                                  | <i>Streptococcus oralis</i>        |
| 56. M0 | Baseline    | Negative              | 1              | Yes                                 | No                                   | <i>Streptococcus mitis</i>         |
| 56. M0 | Baseline    | Negative              | 2              | Yes                                 | Yes                                  | <i>Streptococcus mitis</i>         |
| 36. M3 | Treatment   | Negative              | 1              | Yes                                 | No                                   | <i>Streptococcus parasanguinis</i> |
| 36. M3 | Treatment   | Negative              | 2              | Yes                                 | No                                   | <i>Streptococcus sanguinis</i>     |
| 36. M3 | Treatment   | Negative              | 3              | No                                  | Yes                                  | <i>Streptococcus parasanguinis</i> |
| 42. M3 | Treatment   | Negative              | 1              | Yes                                 | Yes                                  | <i>Streptococcus sanguinis</i>     |
| 3. M3  | Treatment   | Negative              | 1              | Yes                                 | No                                   | <i>Streptococcus vestibularis</i>  |
| 43. M3 | Treatment   | Negative              | 1              | Yes                                 | Yes                                  | <i>Streptococcus peroris</i>       |
| 13. M3 | Treatment   | Negative              | 1              | Yes                                 | Yes                                  | <i>Streptococcus parasanguinis</i> |
| 13. M3 | Treatment   | Negative              | 2              | Yes                                 | Yes                                  | <i>Streptococcus oralis</i>        |
| 16. M3 | Treatment   | Negative              | 1              | Yes                                 | Yes                                  | <i>Streptococcus parasanguinis</i> |
| 16. M3 | Treatment   | Negative              | 2              | Yes                                 | Yes                                  | <i>Streptococcus mitis</i>         |
| 16. M3 | Treatment   | Negative              | 3              | Yes                                 | Yes                                  | <i>Streptococcus vestibularis</i>  |

|        |           |          |   |     |     |                                    |
|--------|-----------|----------|---|-----|-----|------------------------------------|
| 15. M3 | Treatment | Negative | 1 | Yes | Yes | <i>Streptococcus parasanguinis</i> |
| 15. M3 | Treatment | Negative | 2 | Yes | Yes | <i>Streptococcus parasanguinis</i> |
| 47. M3 | Treatment | Negative | 1 | Yes | Yes | <i>Streptococcus gordonii</i>      |
| 47. M3 | Treatment | Negative | 4 | Yes | Yes | <i>Streptococcus parasanguinis</i> |
| 24. M3 | Treatment | Negative | 1 | Yes | Yes | <i>Streptococcus oralis</i>        |
| 29. M3 | Treatment | Positive | 1 | Yes | Yes | <i>Streptococcus parasanguinis</i> |
| 29. M3 | Treatment | Positive | 2 | Yes | Yes | <i>Streptococcus parasanguinis</i> |
| 12. M6 | Treatment | Negative | 1 | Yes | No  | <i>Streptococcus cristatus</i>     |
| 23. M6 | Treatment | Negative | 1 | Yes | No  | <i>Streptococcus salivarius</i>    |
| 23. M6 | Treatment | Negative | 2 | Yes | No  | <i>Streptococcus oralis</i>        |
| 23. M6 | Treatment | Negative | 3 | Yes | No  | <i>Streptococcus sanguinis</i>     |
| 31. M6 | Treatment | Negative | 1 | Yes | No  | <i>Streptococcus sanguinis</i>     |
| 31. M6 | Treatment | Negative | 2 | Yes | No  | <i>Streptococcus sanguinis</i>     |
| 31. M6 | Treatment | Negative | 3 | Yes | No  | <i>Streptococcus sanguinis</i>     |
| 59. M3 | Treatment | Negative | 2 | No  | Yes | <i>Streptococcus mitis</i>         |
| 59. M3 | Treatment | Negative | 3 | No  | Yes | <i>Streptococcus dysgalactiae</i>  |
| 60. M3 | Treatment | Negative | 2 | Yes | No  | <i>Streptococcus infantis</i>      |
| 28. M6 | Treatment | Negative | 2 | Yes | Yes | <i>Streptococcus parasanguinis</i> |
| 28. M6 | Treatment | Negative | 3 | No  | Yes | <i>Streptococcus parasanguinis</i> |
| 28. M6 | Treatment | Negative | 5 | Yes | Yes | <i>Streptococcus pyogenes</i>      |
| 49. M6 | Treatment | Positive | 1 | Yes | No  | <i>Streptococcus pyogenes</i>      |
| 49. M6 | Treatment | Positive | 2 | Yes | Yes | <i>Streptococcus pyogenes</i>      |
| 53. M6 | Treatment | Negative | 1 | Yes | Yes | <i>Streptococcus pyogenes</i>      |
| 53. M6 | Treatment | Negative | 2 | Yes | Yes | <i>Streptococcus pyogenes</i>      |
| 57. M6 | Treatment | Negative | 1 | Yes | Yes | <i>Rothia dentocariosa</i>         |
| 57. M6 | Treatment | Negative | 4 | Yes | No  | <i>Streptococcus mitis</i>         |
| 57. M6 | Treatment | Negative | 9 | Yes | Yes | <i>Rothia dentocariosa</i>         |
| 64. M6 | Treatment | Postive  | 1 | Yes | Yes | <i>Streptococcus mitis</i>         |
